# Supplementary material for: Deciphering Popliteal Artery Aneurysm Patient Diversity: Insights From a Cluster Analysis of the POPART Registry
Source: PubMed Central journal article supplement — J Am Heart Assoc. 2024 Jun 15;13(12):e034429. doi: 10.1161/JAHA.124.034429 (PMC11255753; doi:10.1161/jaha.124.034429), 2024-06-15

# **SUPPLEMENTAL MATERIAL**

**Table S1. A list of all variables used during clustering / phenomapping.**

|                                   |                                                                          |                                                                                        |                                                                                                      |
|-----------------------------------|--------------------------------------------------------------------------|----------------------------------------------------------------------------------------|------------------------------------------------------------------------------------------------------|
| <b>Demographics</b>               | Age                                                                      | Sex                                                                                    |                                                                                                      |
| <b>Basic clinical information</b> | Localisation<br>Thrombus present<br>Inflow quality                       | PAA Diameter<br>Signs and symptoms<br>Outflow vessels                                  | PAA Length<br>Type of presentation<br>presentation                                                   |
| <b>Comorbidities</b>              | AAA<br>Arterial Hypertension<br>Dialysis<br>Smoking<br>Contralateral PAA | Cardial disease<br>History of stroke<br>Diabetes<br>Obesity<br>Other arterial aneurysm | History of myocardial infarction<br>Chronic kidney disease<br>Pulmonary disease<br>Malignant disease |

PAA = popliteal artery aneurysm, AAA = abdominal aortic aneurysm.

**Figure S1. K optimization efforts that resulted in 2 (A) or 6 (B) clusters including symptoms and 6 (C) excluding symptoms. D-F show the respective plots for dimension 1 and 2 depicting the clusters.**

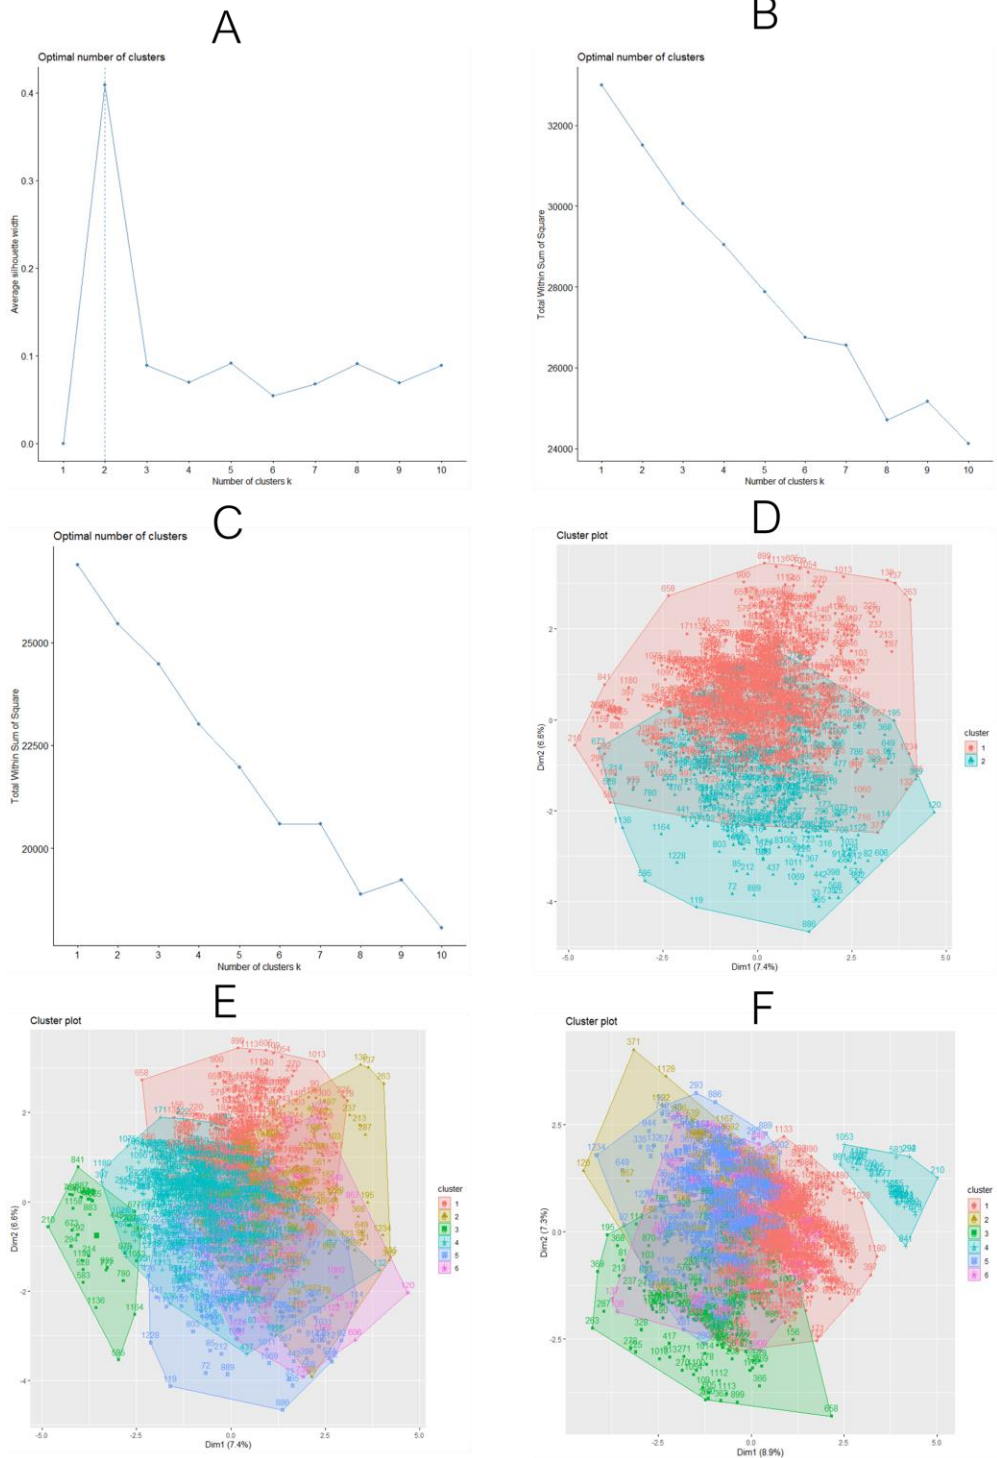

Supplement: JAH3-13-e034429-s001.pdf [file JAH3-13-e034429-s001.pdf]
